# Supplementary material for: Are Parents Getting it Right? A Survey of Parents’ Internet Use for Children’s Health Care Information
Source: PubMed Central journal article supplement (PMC4526953; doi:10.2196/ijmr.3790), 2015-06-22
Supplement: ijmr_v4i2e12_app1.pdf [file ijmr_v4i2e12_app1.pdf]

## **Appendix**

### **Which of the following websites are you familiar with?**

Hospital/university based websites (eg. AboutKidsHealth)

Medical journal/reference websites (eg. Medscape, PubMed, eMedicine)

Public search engines (eg. Google, Bing, Yahoo)

Other health websites (MayoClinic, WebMD)

Popular parenting websites (Today's Parent)

Other

### **How frequently do you use the Internet/websites to search for information around your child's health?**

Never

A few times a year)

Once a month

A few times a month

Every week

Every day

### **What type of device do you use to access children's health information on the Internet? (Please select all that apply)**

Desktop computer

Laptop

Tablet device

Smartphone

None of the above

Other

**What influences how often you use the internet/websites to search for information around your child's health**

**Which of the following do you go to FIRST when searching for information around your child's health?**

Medline/Ovid

Medscape/PubMed/eMedicine

Web MD/MD Consult/Uptodate.com

Google/Bing/Yahoo/Ask.com

Wikipedia

AboutKidsHealth (SickKids)

Today's Parent

Other

**Is there anyone you cross check information you find on websites with? Select from below**

Family Physician

Pediatrician

Friends

Family

Friends/Family in healthcare

Spiritual Adviser

Other

**Which of the following do you consider SAFE sources of information regarding your child's health?**

Hospital/university based websites (eg. AboutKidsHealth)

Medical journal/reference websites (eg. Medscape, PubMed, eMedicine)

Government websites (ex. Ontario Ministry of Health and Long-Term Care, MedlinePlus, Health Canada)

Child health specific websites run by healthcare professionals (ex. KidsHealth.org, HealthyChildren.org)

Public search engines (eg. Google, Bing, Yahoo)

Other health websites (MayoClinic, WebMD)

Popular parenting websites (Today's Parent)

**Which of the following do you consider ACCURATE sources of information regarding your child's health?**

Hospital/university based websites (eg. AboutKidsHealth)

Medical journal/reference websites (eg. Medscape, PubMed, eMedicine)

Government websites (ex. Ontario Ministry of Health and Long-Term Care, MedlinePlus, Health Canada)

Child health specific websites run by healthcare professionals (ex. KidsHealth.org, HealthyChildren.org)

Public search engines (eg. Google, Bing, Yahoo)

Other health websites (MayoClinic, WebMD)

Popular parenting websites (Today's Parent)

**Which of the following do you consider USEFUL sources of information regarding your child's health?**

Hospital/university based websites (eg. AboutKidsHealth)

Medical journal/reference websites (eg. Medscape, PubMed, eMedicine)

Government websites (ex. Ontario Ministry of Health and Long-Term Care, MedlinePlus, Health Canada)

Child health specific websites run by healthcare professionals (ex. KidsHealth.org, HealthyChildren.org)

Public search engines (eg. Google, Bing, Yahoo)

Other health websites (MayoClinic, WebMD)

Popular parenting websites (Today's Parent)

**How likely are you to use each of the following websites in the next 12 months?**

Hospital/university based websites (eg. AboutKidsHealth)

- 1 Unlikely
- 2
- 3
- 4
- 5
- 6
- 7 Likely

Medical journal/reference websites (eg. Medscape, PubMed, eMedicine)  
Government websites (ex. Ontario Ministry of Health and Long-Term Care, MedlinePlus, Health Canada)

- 1 Unlikely
- 2
- 3
- 4
- 5
- 6
- 7 Likely

Child health specific websites run by healthcare professionals (ex. KidsHealth.org, HealthyChildren.org)

- 1 Unlikely
- 2
- 3
- 4
- 5
- 6
- 7 Likely

Public search engines (eg. Google, Bing, Yahoo)

- 1 Unlikely
- 2
- 3
- 4
- 5
- 6

7 Likely

Other health websites (MayoClinic, WebMD)

1 Unlikely

2

3

4

5

6

7 Likely

Popular parenting websites (Today's Parent)

1 Unlikely

2

3

4

5

6

7 Likely

**How likely are you to cross check information from the following websites with a trusted person?**

Hospital/university based websites (eg. AboutKidsHealth)

1 Unlikely

2

3

4

5

6

7 Likely

Medical journal/reference websites (eg. Medscape, PubMed, eMedicine)

Government websites (ex. Ontario Ministry of Health and Long-Term Care, MedlinePlus, Health Canada)

1 Unlikely

2

3

4

5  
6  
7 Likely

Child health specific websites run by healthcare professionals (ex. KidsHealth.org, HealthyChildren.org)

1 Unlikely  
2  
3  
4  
5  
6  
7 Likely

Public search engines (eg. Google, Bing, Yahoo)

1 Unlikely  
2  
3  
4  
5  
6  
7 Likely

Other health websites (MayoClinic, WebMD)

1 Unlikely  
2  
3  
4  
5  
6  
7 Likely

Popular parenting websites (Today's Parent)

1 Unlikely  
2  
3  
4  
5  
6  
7 Likely

**Has your child ever been admitted to hospital before?**

SickKids

Other hospitals (Trillium, Toronto East)

Emergency Room/Walk-in clinic

None of the above

Other

**How many times has your child been admitted into hospital?**

0

1-3

4-6

>6

**What was the longest stay your child had during the admission?**

<24 hours

1-5 days

A week

A few weeks

A month

A few months

Not applicable

**Did you know SickKids has a dedicated Child health Website called AboutKids Health?**

YES

NO

**How likely are you to use AboutKids Health by SickKids? (move slider)**

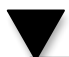

0

100

**What devices are you likely to use to access AboutKids Health?**

Desktop computer

Laptop

Tablet device

Smartphone

None of the above

**What is your primary language?**

**How many boys do you have?**

**How many girls do you have?**
